# Supplementary material
Source: publisher figshare collection journal article supplement (https://acs.figshare.com/ndownloader/files/4404028)
Supplement: Supplementary file 1 [file 4404028]

# Label-Free detection of DNA Hybridization using Surface Enhanced Raman Spectroscopy

Aoune Barhoumi<sup>1</sup> and Naomi J. Halas<sup>1, 2,3,\*</sup>

## Supporting Information

Experimental results of the adenine-free detection of DNA hybridization.

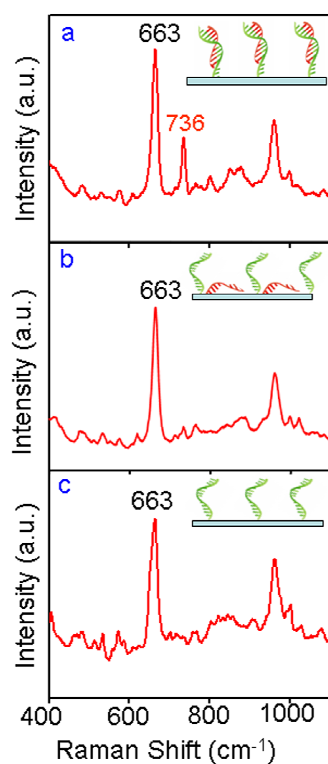

**S1.** SERS label-free detection of DNA hybridization based on adenine-free probe. SERS of: (a) probe SN3 hybridized with complementary DNA sequence C-SN3 (target), (b) probe SN3 hybridized with non-complementary DNA sequence SN4 (control) and (c) DNA probe SN3 (adenine-free) only.

The detection technique discriminates DNA hybridization (a) versus non-specific binding (b). in the case of a non-complementary sequence, where almost no peak appears at 736 cm<sup>-1</sup>. This indicates that non-specific binding is minimal
